# Supplementary material
Source: PubMed Central journal article supplement (PMC8390099)
Supplement: mmc1.pdf [file mmc1.pdf]

# **Drug repurposing for COVID-19 using computational screening: Is Fostamatinib/ R406 a potential candidate? : Supplementary Document**

Sovan Saha <sup>a,+</sup>, Anup Kumar Halder <sup>b,c,+</sup>, Soumyendu Sekhar Bandyopadhyay <sup>c,d</sup>, Piyali Chatterjee <sup>e</sup>,  
Mita Nasipuri <sup>e</sup>, Debdas Bose <sup>f</sup>, Subhadip Basu <sup>c,\*</sup>

<sup>a</sup>Department of Computer Science & Engineering, Institute of Engineering & Management, Salt Lake  
Electronics Complex, Kolkata –700091, West Bengal, India.

<sup>b</sup>Department of Computer Science & Engineering, University of Engineering & Management,  
Kolkata 700156, West Bengal, India.

<sup>c</sup>Department of Computer Science & Engineering, Jadavpur University, Jadavpur,  
Kolkata, West Bengal 700032, India.

<sup>d</sup>Department of Computer Science & Engineering, School of Engineering and Technology, Adamas  
University, Kolkata 700126, West Bengal, India.

<sup>e</sup>Department of Computer Science & Engineering, Netaji Subhash Engineering College, Garia,  
Kolkata, West Bengal 700152, India.

<sup>f</sup>Institute of Hematology and Transfusion Medicine, Medical College Hospital,  
Kolkata, 700073, India

<sup>+</sup>These authors have equal contributions, both shared 1<sup>st</sup> authorship

\*Corresponding author

**Corresponding Author's email:** subhadip.basu@jadavpuruniversity.in

**Corresponding Author's contact:** +91-9674354573

## Basic Terminologies

1. **Protein-Protein Interaction Network (PPIN):** When one protein interacts with another protein, it forms a network-like structure known as PPIN. Generally, it is portrayed as a graph where proteins are represented as nodes, and their corresponding connecting edges represent their interactions. Mathematically, PPIN can be highlighted as a graph  $G_{nv}$ , which consists of vertices  $v$  (nodes) connected by edges  $e$  (links). Thus,  $G_{nv} = (v, e)$  [1].
2. **Level-1 and Level-2 proteins:** In a PPIN, level-1 proteins of a node are those proteins that are in direct connection with that node, i.e., its immediate neighbors, whereas level-2 proteins are those proteins that are indirectly connected with level-1 proteins of that node, i.e., its indirect neighbors [1].
3. **Spreader nodes and spreader edges:** The viral infection gets mediated from one part of the PPIN to another through spreader nodes and edges [2]. Generally, in disease-specific PPIN models, at least two entities are involved: pathogen/Bait and host/Prey [3]. In this research work, SARS-CoV takes the role of the former while human the latter one. Viral proteins of SARS-CoV tend to target their corresponding interaction with human proteins, which target its next level of proteins. So, the establishment of interactions between SARS-CoV and human occurs through connected nodes and edges of PPIN. But mostly, these viral proteins try to interact more with the central/hub proteins rather than the other proteins [2]. Thus, proper identification of central nodes (i.e., spreader nodes) is required. It is also confirmed that the interaction is not possible without the edges connecting two spreader nodes. Thus, these connecting edges are called spreader edges.
4. **Spreadability index:** The spreadability index of node  $i$  [4] is defined as the ability of node  $i$  to mediate a viral infection in a PPIN. Three important network terminologies are involved in the spreadability index. They are 1) Edge ratio [5] 2) Neighborhood diversity [5] 3) Node Weight [6]. Mathematically it can be defined as:  
$$\text{Spreadability\_index}(i) = (\text{Edge ratio}(i) \times \text{neighborhood\_diversity}(i)) + \text{Node weight}(w_i)$$
  
Nodes having a high spreadability index are termed as spreader nodes, i.e., if the viral proteins establish interactions with these nodes, then the viral infection can be mediated to a more significant number of nodes in a much short amount of time compared to the other nodes in PPIN.
5. **MolDock Score:** MolDock is considered to be a new heuristic search algorithm. It combines differential evolution with a cavity prediction algorithm. The docking scoring function of MolDock is an extension of the piecewise linear potential (PLP). It includes new hydrogen bonding and electrostatic terms. As a result, MolDock has a very high docking accuracy for the identification of ligand-binding modes [7].
6. **ReRank Score:** The re-rank score is a linear combination of E-inter (steric, Van der Waals, hydrogen bonding, electrostatic) between the protein and the ligand and E-intra. (torsion, sp<sup>2</sup>-sp<sup>2</sup>, hydrogen bonding, Van der Waals, electrostatic) of the ligand weighted by pre-defined coefficients. The re-ranking procedure is adequate for identifying high-quality binding modes in place of more advanced scoring schemes [7].

## Significance of choosing loss of smell as a major Covid-19 symptom

Several health symptoms like cough, fever, breathing difficulty, *loss of smell* etc., are studied in the proposed research work as highlighted in section 2.3 in the main manuscript. However, “*loss of smell*” is given higher preference in comparison to the other symptoms due to the following reason: 1) According to a correspondence published on April 15, 2020, in *The Lancet Infectious Diseases* [8], it was highlighted by the authors that though the reason of losing smell by COVID-19 patients was not discovered yet, their initial inspection suggests that loss of smell “*manifests either early in the disease process or in patients with mild or no constitutional symptoms.*” 2) Another correspondence published on June 04, 2020, in *The Lancet* [9], stated that “*after quantifying the sensitivity, specificity, positive predicted value, and negative predicted value of fever, cough, fever or cough, and loss of smell in 76 260 users of the COVID Symptom Study app who underwent the SARS-CoV-2 test (13 863 testing positive; 62 397 testing negative), they found that the predictive ability of loss of smell and taste to be higher than fever or persistent cough, which is in line with their previous finding that loss of smell and taste was the strongest predictor of having the virus* [10]. Moreover, they found that the median duration of anosmia symptoms was 5 days, whereas the median duration of fever was only 2 days.”

**Table S1.** List of significant research articles involving potential recommended drugs for COVID-19

| SL. No. | Journal/Article name                                                                                                                                                      | Involved drugs                             | Report type                                | Drug Categorization          | Results/Outcome                                                                           |
|---------|---------------------------------------------------------------------------------------------------------------------------------------------------------------------------|--------------------------------------------|--------------------------------------------|------------------------------|-------------------------------------------------------------------------------------------|
| 1       | The Use of Anti-Inflammatory Drugs in the Treatment of People With Severe Coronavirus Disease 2019 (COVID-19): The Perspectives of Clinical Immunologists From China [11] | Glucocorticoids                            | Clinical                                   | Anti-malarial                | Confirmation of the short-term efficacy of HCQ in the treatment of COVID-19               |
|         |                                                                                                                                                                           | IL-6 antagonist                            |                                            | Anti-inflammatory            |                                                                                           |
|         |                                                                                                                                                                           | JAK inhibitors                             |                                            |                              |                                                                                           |
|         |                                                                                                                                                                           | Chloroquine (CQ)/ Hydroxychloroquine (HCQ) |                                            |                              |                                                                                           |
| 2       | Hydroxychloroquine and azithromycin as a treatment of COVID-19: results of an open-label non-randomized clinical trial [12]                                               | HCQ                                        | Clinical                                   | Anti-viral                   | A combination of the two is effective in the extermination of coronavirus.                |
|         |                                                                                                                                                                           | Azithromycin                               |                                            | Anti-inflammatory            |                                                                                           |
| 3       | Lianhuaqingwen exerts anti-viral and anti-inflammatory activity against novel coronavirus (SARS-CoV-2) [13]                                                               | Lianhuaqingwen (LH)                        | Laboratory test                            | Traditional Chinese Medicine | LH hinders the replication of SARS-COV-2                                                  |
| 4       | Hydroxychloroquine, a less toxic derivative of chloroquine, is effective in inhibiting SARS-CoV-2 infection in vitro. [14]                                                | HCQ                                        | <i>In vitro</i> Cytotoxicity and antiviral | Anti-malarial                | HCQ can effectively stop the infection of SARS-CoV-2 <i>in vitro</i> .                    |
|         |                                                                                                                                                                           |                                            |                                            | Anti-inflammatory            |                                                                                           |
| 5       | Aminoquinolines Against Coronavirus Disease 2019 (COVID-19): Chloroquine or Hydroxychloroquine [15]                                                                       | HCQ                                        | Opinion paper                              | Anti-malarial                | Though both HCQ and CQ are beneficial, HCQ is safer in comparison to CQ                   |
|         |                                                                                                                                                                           | CQ                                         |                                            | Anti-viral                   |                                                                                           |
|         |                                                                                                                                                                           | Other medicinal agents                     |                                            |                              |                                                                                           |
| 6       | Experimental Treatment with Favipiravir for COVID-19: An Open-Label Control Study [16]                                                                                    | Favipiravir (FPV)                          | Clinical                                   | Anti-viral                   | FPV performs a faster clearance of viral infection with a better chance in chest imaging. |
| 7       | TH17 responses in cytokine storm of COVID-                                                                                                                                | Janus kinase 2 (JAK2)                      | <i>In vitro</i> study                      | Anti-inflammatory            | JAK2 inhibitor Fedratinib can prevent the                                                 |

|    |                                                                                                                                                                                                                        |                                           |                                                 |                              |                                                                                                                                         |
|----|------------------------------------------------------------------------------------------------------------------------------------------------------------------------------------------------------------------------|-------------------------------------------|-------------------------------------------------|------------------------------|-----------------------------------------------------------------------------------------------------------------------------------------|
|    | 19: An emerging target of JAK2 inhibitor Fedratinib [17]                                                                                                                                                               | Fedratinib                                |                                                 |                              | deteriorating outcomes of TH17 associated cytokine storms in COVID-19.                                                                  |
| 8  | In Vitro Antiviral Activity and Projection of Optimized Dosing Design of Hydroxychloroquine for the Treatment of Severe Acute Respiratory Syndrome Coronavirus 2 (SARS-CoV-2) [18]                                     | HCQ                                       | <i>In vitro</i> study                           | Anti-malarial                | Inhibits COVID-19.                                                                                                                      |
|    |                                                                                                                                                                                                                        | CQ                                        |                                                 |                              |                                                                                                                                         |
| 9  | Coronavirus Disease 2019 (COVID-19) Pneumonia in a Hemodialysis Patient [19]                                                                                                                                           | Lopinavir                                 | Case study on Hemodialysis Patient              | Anti-viral                   | Recovery symptoms noted though the combination of the drugs needs more testing.                                                         |
|    |                                                                                                                                                                                                                        | Ritonavir                                 |                                                 |                              |                                                                                                                                         |
| 10 | Repurposing of clinically approved drugs for treatment of coronavirus disease 2019 in a 2019-novel coronavirus (2019-nCoV) related coronavirus model. [20]                                                             | Cepharanthine                             | Cell culture and pangolin coronavirus modelling | Anti-inflammatory            | Reduction of cytopathic effects in cell culture.                                                                                        |
|    |                                                                                                                                                                                                                        | Selamectin                                |                                                 | antineoplastic               |                                                                                                                                         |
|    |                                                                                                                                                                                                                        | Mefloquine                                |                                                 | anti-parasitic               |                                                                                                                                         |
| 11 | Traditional Chinese Medicine for COVID-19 Treatment [21]                                                                                                                                                               | Qingfei paidu decoction                   | Case study                                      | Traditional Chinese Medicine | Control COVID-19.                                                                                                                       |
| 12 | COVID-19: combining antiviral and anti-inflammatory treatments [22]                                                                                                                                                    | Baricitinib                               | <i>In silico</i>                                | Anti-inflammatory            | Favourable in COVID-19 treatment.                                                                                                       |
|    |                                                                                                                                                                                                                        | Fedratinib                                |                                                 |                              |                                                                                                                                         |
|    |                                                                                                                                                                                                                        | Ruxolitinib                               |                                                 |                              |                                                                                                                                         |
| 13 | The antiviral compound remdesivir potently inhibits RNA-dependent RNA polymerase from Middle East respiratory syndrome coronavirus. [23]                                                                               | Remdesivir                                | <i>In vitro</i> study                           | Anti-viral                   | High effectiveness of remdesivir against RNA viruses in cell-based assays.                                                              |
| 14 | Virus against virus: a potential treatment for 2019-nCov (SARS-CoV-2) and other RNA viruses. [24]                                                                                                                      | CRISPR/Cas13d strategy                    | <i>In vitro</i> test                            | Other treatment/drugs        | Capable of RNA virus treatment                                                                                                          |
| 15 | Therapeutic options for the 2019 novel coronavirus (2019-nCoV) [25]                                                                                                                                                    | Remdesivir                                | Opinion                                         | Anti-viral                   | Biocontainment capability against covid-19.                                                                                             |
|    |                                                                                                                                                                                                                        | Umifenovir                                |                                                 |                              |                                                                                                                                         |
|    |                                                                                                                                                                                                                        | Oseltamivir                               |                                                 |                              |                                                                                                                                         |
|    |                                                                                                                                                                                                                        | ASC09F                                    |                                                 |                              |                                                                                                                                         |
|    |                                                                                                                                                                                                                        | Other inhibitors                          |                                                 |                              |                                                                                                                                         |
| 16 | Inhibitors of RAS Might Be a Good Choice for the Therapy of COVID-19 Pneumonia [26]                                                                                                                                    | Renin-Angiotensin System (RAS) inhibitors | Opinion                                         | Other treatment/drugs        | ACEI and ATIR inhibitors could be used in patients with COVID-19 pneumonia to reduce the pulmonary inflammatory response and mortality. |
| 17 | Case of the Index Patient Who Caused Tertiary Transmission of Coronavirus Disease 2019 in Korea: the Application of Lopinavir/Ritonavir for the Treatment of COVID-19 Pneumonia Monitored by Quantitative RT-PCR. [27] | Lopinavir                                 | Clinical                                        | Anti-viral                   | Combat COVID-19 harmful effect.                                                                                                         |
|    |                                                                                                                                                                                                                        | RitonavirA                                |                                                 |                              |                                                                                                                                         |
| 18 | Therapeutic strategies in an outbreak scenario to treat the novel coronavirus originating in Wuhan, China [28]                                                                                                         | Angiotensin-converting enzyme 2           | Opinion                                         | Other treatment/drugs        | Potentiality of ACE2-Fc to act as the neutralizing antibody which can be used for COVID-19 treatment.                                   |

|             |                                                                                                                                                                         |                              |                                |                              |                                                                              |
|-------------|-------------------------------------------------------------------------------------------------------------------------------------------------------------------------|------------------------------|--------------------------------|------------------------------|------------------------------------------------------------------------------|
| 19          | Remdesivir and chloroquine effectively inhibit the recently emerged novel coronavirus (2019-nCoV) in vitro. [29]                                                        | Remdesivir                   | <i>In vitro</i> study          | Anti-viral                   | Drugs proved to be effective with Remdesivir and chloroquine.                |
|             |                                                                                                                                                                         | Ribavirin                    |                                | Anti-malarial                |                                                                              |
|             |                                                                                                                                                                         | Penciclovir                  |                                |                              |                                                                              |
|             |                                                                                                                                                                         | Nitazoxanide                 |                                |                              |                                                                              |
|             |                                                                                                                                                                         | Nafamostat                   |                                |                              |                                                                              |
|             |                                                                                                                                                                         | Remdesivir                   |                                |                              |                                                                              |
|             |                                                                                                                                                                         | Favipiravir                  |                                |                              |                                                                              |
| Chloroquine |                                                                                                                                                                         |                              |                                |                              |                                                                              |
| 20          | Clinical characteristics and therapeutic procedure for four cases with 2019 novel coronavirus pneumonia receiving combined Chinese and Western medicine treatment. [30] | Lopinavir/Ritonavir          | Case study                     | Anti-viral                   | Effective treatment was observed.                                            |
|             |                                                                                                                                                                         | Arbidol                      |                                | Anti-malarial                |                                                                              |
|             |                                                                                                                                                                         | Shufeng Jiedu                |                                |                              |                                                                              |
| 21          | First case of 2019 novel coronavirus in the United States. [31]                                                                                                         | Remdesivir                   | Case Study on a single patient | Anti-viral                   | The patient got recovered.                                                   |
| 22          | One highly suspected case of novel coronavirus pneumonia treated by Integrated Traditional Chinese and Western medicine and nucleic acid analysis. [32]                 | Traditional Chinese Medicine | Case Study on a single patient | Traditional Chinese Medicine | The patient got recovered.                                                   |
| 23          | COVID-19 in patients with HIV: clinical case series [33]                                                                                                                | Darunavir                    | Case Study on a single patient | Anti-viral                   | Darunavir was proved to be ineffective against COVID-19 due to low affinity. |
| 24          | Favipiravir: Pharmacokinetics and Concerns About Clinical Trials for 2019-nCoV Infection [34]                                                                           | Favipiravir                  | Opinion                        | Anti-viral                   | Recommendation for use in COVID-19. Needs more clinical confirmation.        |
| 25          | Remdesivir for COVID-19: challenges of underpowered studies [35]                                                                                                        | Remdesivir                   | Case study                     | Anti-viral                   | Effective against COVID-19.                                                  |

**Table S2.** Few statistical analyses of genes in COVID-19 symptoms, risk factors and clinical outcome

| <b>Categorizations</b>                        | <b>Symptoms</b>      | <b>Total no. of genes</b> |
|-----------------------------------------------|----------------------|---------------------------|
| COVID-19 symptoms [36]                        | Cough                | 270                       |
|                                               | Fever                | 1743                      |
|                                               | Dyspnea              | 323                       |
|                                               | Pneumonia            | 1416                      |
| Risk factors [36]                             | Heart Disease        | 1964                      |
|                                               | Kidney Disease       | 2131                      |
|                                               | Lung Disease         | 1018                      |
|                                               | Diabetes             | 5078                      |
|                                               | Hypertension         | 1573                      |
|                                               | Cancer               | 4747                      |
| Clinical Outcomes (Mild & Moderate Case) [36] | Lymphopenia          | 241                       |
|                                               | Pulmonary infiltrate | 43                        |
| Clinical Outcomes (Severe Case) [36]          | Leukocytosis         | 179                       |
|                                               | Neutrophilia         | 152                       |
|                                               | Sepsis               | 1506                      |
|                                               | Kidney injury        | 228                       |
|                                               | Coagulopathy         | 21                        |
|                                               | Thrombocytopenia     | 774                       |
| Multiple organ failure                        | 25                   |                           |

**Table S3.** Mapping of FDA drug of DrugBank with selected key genes of level-1

| Level-1 Key Genes | Approved/Approved & Investigational Drug |                |
|-------------------|------------------------------------------|----------------|
|                   | Drug                                     | Drug ID        |
| PPIA              | Cyclosporine                             | DB00091        |
|                   | Copper                                   | DB09130        |
| ACE2              | Hydroxychloroquine                       | DB01611        |
|                   | Chloroquine                              | DB00608        |
| EIF3F             | No approved drug                         |                |
| UBC               | No approved drug                         |                |
| PRKDC             | Caffeine                                 | DB00201        |
| CDK2              | Bosutinib                                | DB06616        |
| <i>CDK1</i>       | <i>Fostamatinib</i>                      | <i>DB12010</i> |
| PRKCA             | D-alpha-Tocopherol acetate               | DB14002        |
|                   | Midostaurin                              | DB06595        |
|                   | alpha-Tocopherol succinate               | DB14001        |
|                   | Phosphatidyl serine                      | DB00144        |
|                   | Vitamin E                                | DB00163        |
|                   | Tamoxifen                                | DB00675        |
| AKT1              | Ingenol mebutate                         | DB05013        |
|                   | Arsenic trioxide                         | DB01169        |
| TRAF6             | No approved drug                         |                |

**Table S4.** Mapping of FDA drug of DrugBank with selected key genes of level-2

| Level-2 Key Genes | Approved/Approved & Investigational Drug |                |
|-------------------|------------------------------------------|----------------|
|                   | Drug                                     | Drug ID        |
| APP               | Aluminium phosphate                      | DB14517        |
|                   | Dimercaprol                              | DB06782        |
|                   | Copper                                   | DB09130        |
|                   | Florbetapir (18F)                        | DB09149        |
|                   | Flutemetamol (18F)                       | DB09151        |
|                   | Deferoxamine                             | DB00746        |
|                   | Zinc                                     | DB01593        |
|                   | Zinc sulfate, unspecified form           | DB14548        |
|                   | Florbetaben (18F)                        | DB09148        |
|                   | Zinc acetate                             | DB14487        |
|                   | Aluminum acetate                         | DB14518        |
|                   | Aluminium                                | DB01370        |
| Zinc chloride     | DB14533                                  |                |
| ELAVL1            | No approved drug                         |                |
| <i>NTRK1</i>      | Entrectinib                              | DB11986        |
|                   | <i>Fostamatinib</i>                      | <i>DB12010</i> |
|                   | Cenegermin                               | DB13926        |
|                   | Amitriptyline                            | DB00321        |
|                   | Imatinib                                 | DB00619        |
|                   | Regorafenib                              | DB08896        |
| Larotrectinib     | DB14723                                  |                |
| XPO1              | Selinexor                                | DB11942        |
| MEOX2             | No approved drug                         |                |
| GRB2              | Pegademase                               | DB00061        |
| <i>EGFR</i>       | Lidocaine                                | DB00281        |
|                   | Gefitinib                                | DB00317        |
|                   | <i>Fostamatinib</i>                      | <i>DB12010</i> |
|                   | Zanubrutinib                             | DB15035        |
|                   | Cetuximab                                | DB00002        |
|                   | Erlotinib                                | DB00530        |
|                   | Vandetanib                               | DB05294        |
|                   | Osimertinib                              | DB09330        |
|                   | Dacomitinib                              | DB11963        |
| Brigatinib        | DB12267                                  |                |

|      |                                  |         |
|------|----------------------------------|---------|
|      | Foreskin keratinocyte (neonatal) | DB10772 |
|      | Trastuzumab                      | DB00072 |
|      | Lapatinib                        | DB01259 |
|      | Panitumumab                      | DB01269 |
|      | Afatinib                         | DB08916 |
|      | Necitumumab                      | DB09559 |
|      | Neratinib                        | DB11828 |
| TP53 | Zinc acetate                     | DB14487 |
|      | Zinc chloride                    | DB14533 |
|      | Acetylsalicylic acid             | DB00945 |
|      | Zinc                             | DB01593 |
|      | Zinc sulfate, unspecified form   | DB14548 |
| BAG3 | No approved drug                 |         |
| NXF1 | No approved drug                 |         |

**Table S5.** Mapping of FDA drug of DrugBank with selected key genes of level-2 associated with “*loss of smell*” symptom of COVID19

| Genes in L2 n-CoV | Target drugs             | DrugId  | Approved    |
|-------------------|--------------------------|---------|-------------|
| DCC 2             | N/A                      | N/A     | N/A         |
| EIF4G1            | N/A                      | N/A     | N/A         |
| GIGYF2            | N/A                      | N/A     | N/A         |
| HTRA2             | N/A                      | N/A     | N/A         |
| LRRK2             | Fostamatinib             | DB12010 | <b>TRUE</b> |
| PARK7             | Copper                   | DB09130 | <b>TRUE</b> |
| PINK1             | N/A                      | N/A     | N/A         |
| PODXL             | N/A                      | N/A     | N/A         |
| PTPN11            | Dodecyltrimethylammonium | DB02779 | FALSE       |
| SNCA              | Copper                   | DB09130 | <b>TRUE</b> |
| UCHL1             | Phenethyl Isothiocyanate | DB12695 | FALSE       |
| VPS35             | N/A                      | N/A     | N/A         |

**Table S6.** Best dock poses for potential COVID19 drugs and interactions of hydrogen bonds with respect to 6LU7

| Drugs              | Drug ID | Moldock score | Rerank Score | Best docked poses                                                                   | H-bond interaction details best pose                                                 | H-bond interaction best pose                                                         |
|--------------------|---------|---------------|--------------|-------------------------------------------------------------------------------------|--------------------------------------------------------------------------------------|--------------------------------------------------------------------------------------|
| Fostamatinib       | DB12010 | -140.495      | -102.464     | 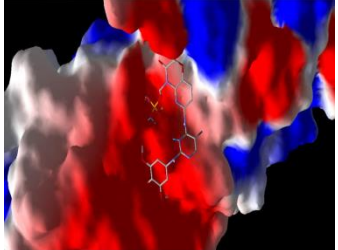  |   |   |
| Remdesivir         | DB14761 | -134.19       | -56.312      |   |   |   |
| Hydroxychloroquine | DB01611 | -106.266      | -69.417      |  |  |  |



|              |         |          |         |                                                                                     |                                                                                      |                                                                                      |
|--------------|---------|----------|---------|-------------------------------------------------------------------------------------|--------------------------------------------------------------------------------------|--------------------------------------------------------------------------------------|
| Favipiravir  | DB12466 | -62.855  | -55.371 | 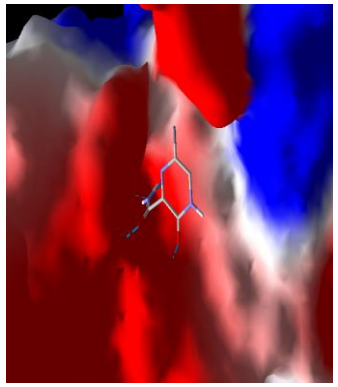  |   |   |
| Darunavir    | DB01264 | -128.798 | -80.316 |   |   |   |
| Azithromycin | DB00207 | -86.77   | 29.53   |  |  |  |

|           |         |         |        |                                                                                    |                                                                                     |                                                                                     |
|-----------|---------|---------|--------|------------------------------------------------------------------------------------|-------------------------------------------------------------------------------------|-------------------------------------------------------------------------------------|
| Lopinavir | DB01601 | -83.09  | -30.19 | 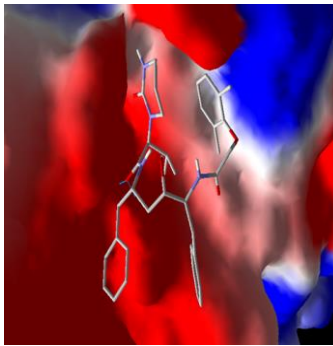 |  |  |
| Ritonavir | DB00503 | -110.36 | 103.40 |  |  |  |

**Table S7.** Best dock poses for active metabolites/promoieties of potential COVID-19 Prodrugs with respect to 6LU7

| Prodrugs     | Drug id | Active promoieties                 | Moldock Score | Rerank Score | Best docked poses                                                                   | H-bond interaction details best pose                                                 | H-bond interaction best pose                                                         |
|--------------|---------|------------------------------------|---------------|--------------|-------------------------------------------------------------------------------------|--------------------------------------------------------------------------------------|--------------------------------------------------------------------------------------|
| Fostamatinib | DB12010 | R406<br>(using 3FQS)<br>[37, 38]   | -110.11       | -93.83       | 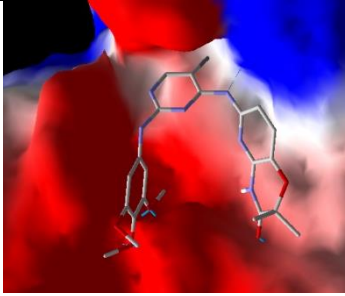  |   |   |
| Remdesivir   | DB14761 | GS-441524                          | -93.37        | -76.07       |   |   |   |
| Favipiravir  | DB12466 | RdRp complex<br>(6K32)<br>[39, 40] | -50.72        | -45.20       |  |  |  |

## References

- [1] S. Saha, P. Chatterjee, S. Basu, M. Nasipuri, D. Plewczynski, Funpred 3.0: Improved protein function prediction using protein interaction network, *PeerJ* 2019(5) (2019) e6830-e6830.
- [2] A.F. Brito, J.W. Pinney, Protein-Protein Interactions in Virus-Host Systems, *Frontiers in Microbiology* 8(1557) (2017).
- [3] S. Saha, K. Sengupta, P. Chatterjee, S. Basu, M. Nasipuri, Analysis of protein targets in pathogen-host interaction in infectious diseases: a case study on *Plasmodium falciparum* and *Homo sapiens* interaction network, *Briefings in Functional Genomics* 17(6) (2017) 441-450.
- [4] S. Saha, P. Chatterjee, S. Basu, M. Nasipuri, Detection of spreader nodes and ranking of interacting edges in Human-SARS-CoV protein interaction network, *bioRxiv* (2020) 2020.04.12.038216-2020.04.12.038216.
- [5] N. Samadi, A. Bouyer, Identifying influential spreaders based on edge ratio and neighborhood diversity measures in complex networks, *Computing* 101(8) (2019) 1147-1175.
- [6] S. Wang, F. Wu, Detecting overlapping protein complexes in PPI networks based on robustness, *Proteome Science* 11(Suppl 1) (2013) 1-8.
- [7] R. Thomsen, M.H. Christensen, MolDock: a new technique for high-accuracy molecular docking, *Journal of Medicinal Chemistry* (0022-2623 (Print)).
- [8] M.S. Xydakis, P. Dehgani-Mobaraki, E.H. Holbrook, U.W. Geisthoff, C. Bauer, C. Hautefort, P. Herman, G.T. Manley, D.M. Lyon, C. Hopkins, Smell and taste dysfunction in patients with COVID-19, *The Lancet Infectious Diseases* 20(9) (2020) 1015-1016.
- [9] C. Menni, C.H. Sudre, C.J. Steves, S. Ourselin, T.D. Spector, Quantifying additional COVID-19 symptoms will save lives, *The Lancet* 395(10241) (2020) e107-e108.
- [10] C. Menni, A.M. Valdes, M.B. Freidin, C.H. Sudre, L.H. Nguyen, D.A. Drew, S. Ganesh, T. Varsavsky, M.J. Cardoso, J.S. El-Sayed Moustafa, A. Visconti, P. Hysi, R.C.E. Bowyer, M. Mangino, M. Falchi, J. Wolf, S. Ourselin, A.T. Chan, C.J. Steves, T.D. Spector, Real-time tracking of self-reported symptoms to predict potential COVID-19, *Nature Medicine* 26(7) (2020) 1037-1040.
- [11] W. Zhang, Y. Zhao, F. Zhang, Q. Wang, T. Li, Z. Liu, J. Wang, Y. Qin, X. Zhang, X. Yan, X. Zeng, S. Zhang, The use of anti-inflammatory drugs in the treatment of people with severe coronavirus disease 2019 (COVID-19): The experience of clinical immunologists from China, *Clinical immunology (Orlando, Fla.)* 214 (2020).
- [12] P. Gautret, J.-C. Lagier, P. Parola, V.T. Hoang, L. Meddeb, M. Mailhe, B. Doudier, J. Courjon, V. Giordanengo, V.E. Vieira, H.T. Dupont, S. Honoré, P. Colson, E. Chabrière, B. La Scola, J.-M. Rolain, P. Brouqui, D. Raoult, Hydroxychloroquine and azithromycin as a treatment of COVID-19: results of an open-label non-randomized clinical trial, *International Journal of Antimicrobial Agents* (2020) 105949-105949.
- [13] L. Runfeng, H. Yunlong, H. Jicheng, P. Weiqi, M. Qinhai, S. Yongxia, L. Chufang, Z. Jin, J. Zhenhua, J. Haiming, Z. Kui, H. Shuxiang, D. Jun, L. Xiaobo, H. Xiaotao, W. Lin, Z. Nanshan, Y. Zifeng, Lianhuaqingwen exerts anti-viral and anti-inflammatory activity against novel coronavirus (SARS-CoV-2), *Pharmacological Research* 156 (2020) 104761-104761.
- [14] J. Liu, R. Cao, M. Xu, X. Wang, H. Zhang, H. Hu, Y. Li, Z. Hu, W. Zhong, M. Wang, Hydroxychloroquine, a less toxic derivative of chloroquine, is effective in inhibiting SARS-CoV-2 infection in vitro, *Cell Discovery* 6 (2020) 1-4.
- [15] Z. Sahraei, M. Shabani, S. Shokouhi, A. Saffaei, Aminoquinolines against coronavirus disease 2019 (COVID-19): chloroquine or hydroxychloroquine, *International Journal of Antimicrobial Agents* 55(4) (2020).
- [16] Q. Cai, M. Yang, D. Liu, J. Chen, D. Shu, J. Xia, X. Liao, Y. Gu, Q. Cai, Y. Yang, C. Shen, X. Li, L. Peng, D. Huang, J. Zhang, S. Zhang, F. Wang, J. Liu, L. Chen, S. Chen, Z. Wang, Z. Zhang, R. Cao, W. Zhong, Y. Liu, L. Liu, Experimental Treatment with Favipiravir for COVID-19: An Open-Label Control Study, *Engineering* (2020).
- [17] D. Wu, X.O. Yang, TH17 responses in cytokine storm of COVID-19: An emerging target of JAK2 inhibitor Fedratinib, *Journal of Microbiology, Immunology and Infection* (2020).
- [18] X. Yao, F. Ye, M. Zhang, C. Cui, B. Huang, P. Niu, L. Zhao, E. Dong, C. Song, S. Zhan, R. Lu, H. Li, D. Liu, D. Clinical, D. Liu, W. Tan, D. Liu, D. Clinical, In Vitro Antiviral Activity and Projection of Optimized Dosing Design of Hydroxychloroquine for the Treatment of Severe Acute Respiratory Syndrome Main point : Hydroxychloroquine was found to be more potent than chloroquine at inhibiting SARS-CoV-2 in vit, *Clinical Infectious Diseases* 2 (2020) 1-25.
- [19] B. Tang, S. Li, Y. Xiong, M. Tian, J. Yu, L. Xu, L. Zhang, Z. Li, J. Ma, F. Wen, Z. Feng, X. Liang, W. Shi, S. Liu, Coronavirus Disease 2019 (COVID-19) Pneumonia in a Hemodialysis Patient, *Kidney Medicine* (2020).
- [20] H.H. Fan, L.Q. Wang, W.L. Liu, X.P. An, Z.D. Liu, X.Q. He, L.H. Song, Y.G. Tong, Repurposing of clinically approved drugs for treatment of coronavirus disease 2019 in a 2019-novel coronavirus (2019-nCoV) related coronavirus model, *Chinese medical journal* 133(9) (2020).

- [21] J.I. Ren, A.H. Zhang, X.J. Wang, Traditional Chinese medicine for COVID-19 treatment, *Pharmacological research* 155 (2020).
- [22] J. Stebbing, A. Phelan, I. Griffin, C. Tucker, O. Oechsle, D. Smith, P. Richardson, COVID-19: combining antiviral and anti-inflammatory treatments, *The Lancet. Infectious diseases*, 20 (2020) 400-402.
- [23] C.J. Gordon, E.P. Tchesnokov, J.Y. Feng, D.P. Porter, M. Götte, The antiviral compound remdesivir potently inhibits RNA-dependent RNA polymerase from Middle East respiratory syndrome coronavirus, *The Journal of biological chemistry* 295 (2020) 4773-4779.
- [24] T.M. Nguyen, Y. Zhang, P.P. Pandolfi, Virus against virus: a potential treatment for 2019-nCoV (SARS-CoV-2) and other RNA viruses, *Cell Research* 30 (2020) 189-190.
- [25] G. Li, E. De Clercq, Therapeutic options for the 2019 novel coronavirus (2019-nCoV), *Nature Reviews Drug Discovery* 19 (2020) 149-150.
- [26] S. Mi, Y. Jm, S. Yp, S. Gh, Inhibitors of RAS Might Be a Good Choice for the Therapy of COVID-19 Pneumonia, *Zhonghua jie he he hu xi za zhi = Zhonghua jiehe he huxi zazhi = Chinese journal of tuberculosis and respiratory diseases* 43(0) (2020).
- [27] J. Lim, S. Jeon, H.Y. Shin, M.J. Kim, Y.M. Seong, W.J. Lee, K.W. Choe, Y.M. Kang, B. Lee, S.J. Park, Case of the index patient who caused tertiary transmission of coronavirus disease 2019 in Korea: The application of lopinavir/ritonavir for the treatment of COVID-19 pneumonia monitored by quantitative RT-PCR, *Journal of Korean Medical Science* 35(6) (2020).
- [28] R.L. Kruse, Therapeutic strategies in an outbreak scenario to treat the novel coronavirus originating in Wuhan, China [version 2; peer review: 2 approved], *F1000Research* 9 (2020).
- [29] M. Wang, R. Cao, L. Zhang, X. Yang, J. Liu, M. Xu, Z. Shi, Z. Hu, W. Zhong, G. Xiao, Remdesivir and chloroquine effectively inhibit the recently emerged novel coronavirus (2019-nCoV) in vitro, *Cell Research* 30 (2020) 269-271.
- [30] Z. Wang, X. Chen, Y. Lu, F. Chen, W. Zhang, Clinical characteristics and therapeutic procedure for four cases with 2019 novel coronavirus pneumonia receiving combined Chinese and Western medicine treatment, *BioScience Trends* 14(1) (2020).
- [31] M.L. Holshue, C. DeBolt, S. Lindquist, K.H. Lofy, J. Wiesman, H. Bruce, C. Spitters, K. Ericson, S. Wilkerson, A. Tural, G. Diaz, A. Cohn, L. Fox, A. Patel, S.I. Gerber, L. Kim, S. Tong, X. Lu, S. Lindstrom, M.A. Pallansch, W.C. Weldon, H.M. Biggs, T.M. Uyeki, S.K. Pillai, First Case of 2019 Novel Coronavirus in the United States, *New England Journal of Medicine* 382(10) (2020) 929-936.
- [32] H.L. Zhang, Y.X. Zhu, One highly suspected case of novel coronavirus pneumonia treated by Integrated Traditional Chinese and Western medicine and nucleic acid analysis, *Tianjin Journal of Traditional Chinese Medicine*. (2020).
- [33] J.L. Blanco, J. Ambrosioni, F. Garcia, E. Martínez, A. Soriano, J. Mallolas, J.M. Miro, COVID-19 in patients with HIV: clinical case series, *The Lancet* 7 (2020) e314-e316.
- [34] Y.X. Du, X.P. Chen, Favipiravir: Pharmacokinetics and Concerns About Clinical Trials for 2019-nCoV Infection, *Clinical Pharmacology & Therapeutics* (2020) cpt.1844-cpt.1844.
- [35] I.T. Lancet, Y. Wang, Remdesivir for COVID-19 : challenges of underpowered studies, *The Lancet* 6736(20) (2020) 31022-31023.
- [36] S. Kumar, COVID-19: A drug repurposing and biomarker identification by using comprehensive gene-disease associations through protein-protein interaction network analysis, *Preprints (March)* (2020).
- [37] RCSB PDB - 3FQS: Crystal structure of spleen tyrosine kinase complexed with R406, 2021. <https://www.rcsb.org/structure/3fqs>. (Accessed 28-02-2021 Access 2021).
- [38] A.G. Villaseñor, R. Kondru, H. Ho, S. Wang, E. Papp, D. Shaw, J.W. Barnett, M.F. Browner, A. Kuglstatler, Structural Insights for Design of Potent Spleen Tyrosine Kinase Inhibitors from Crystallographic Analysis of Three Inhibitor Complexes, *Chemical Biology & Drug Design* 73(4) (2009) 466-470.
- [39] RCSB PDB - 6K32: RdRp complex, 2021. <https://www.rcsb.org/structure/6K32>. (Accessed 28-02-2021 Access 2021).
- [40] X. Li, L. Wang, X. Wang, W. Chen, T. Yang, J. Song, H. Liu, L. Cheng, Structure of RdRps Within a Transcribing dsRNA Virus Provides Insights Into the Mechanisms of RNA Synthesis, *Journal of Molecular Biology* 432(2) (2020) 358-366.
